1  
2  
3  
4  
5  
6  
7  
8  
9  
10  
11  
12  
13  
14  
15  
16  
17  
18  
19  
20  
21  
22  
23  
24  
25  
26  
27  
28

## **The effect of light vs dark coat color on thermal status in Labrador Retriever dogs.**

### **Authors:**

Caitlin Neander<sup>1</sup>, Janice Baker<sup>2</sup>, Kathleen Kelsey<sup>3</sup>, Jean Feugang<sup>4</sup>, Erin Perry<sup>1\*</sup>

### **Affiliations:**

<sup>1</sup>Department of Animal Science, Food and Nutrition, College of Agriculture Science, Southern Illinois University, Carbondale, IL

<sup>2</sup>Veterinary Tactical Group, Vass, NC 28394

<sup>3</sup>Working Dog Enterprises, Sturgeon, MO 65284

<sup>4</sup>Department of Animal and Dairy Science, College of Agriculture and Life Sciences, Mississippi State University, Mississippi State, MS

\* Corresponding author: [erin.perry@siu.edu](mailto:erin.perry@siu.edu)

## 29 **Abstract**

30           Although dark coat color in dogs has been theorized as a risk factor for thermal stress,  
31 there is little evidence in the scientific literature to support that position. We utilized 16 non-  
32 conditioned Labradors (8 black and 8 yellow) in a three-phase test to examine effects of coat  
33 color on thermal status of the dog. Rectal, gastrointestinal (GI), surface temperature, and  
34 respiration rate measured in breaths per minute (bpm), were collected prior to (Baseline — phase  
35 1) and immediately after a controlled 30-minute walk in an open-air environment on a sunny day  
36 (Sunlight — phase 2). Follow up measurements were taken 15 minutes after walking (Cool  
37 down – phase 3) to determine post-exposure return to baseline. No effect of coat color was  
38 measured for rectal, gastrointestinal or surface temperature, or respiration ( $P > 0.05$ ) in dogs  
39 following their 30-minute walk. Temperatures increased similarly across both coat colors (rectal  
40  $1.88^{\circ}\text{C}$  and  $1.83^{\circ}\text{C}$ ; GI  $1.89^{\circ}\text{C}$  and  $1.94^{\circ}\text{C}$ ; eye  $1.89^{\circ}\text{C}$  and  $1.94^{\circ}\text{C}$ ; abdominal  $2.93^{\circ}\text{C}$  and  
41  $2.35^{\circ}\text{C}$ ) for black and yellow dogs respectively during the sunlight phase ( $P > 0.05$ ). All  
42 temperatures and respiration rates decreased similarly across coat colors for rectal ( $0.9^{\circ}\text{C}$  and  $1.0$   
43  $^{\circ}\text{C}$ ) and GI ( $1.5^{\circ}\text{C}$  and  $1.3^{\circ}\text{C}$ ) for black and yellow dogs respectively ( $P > 0.05$ ). Similarly, sex did  
44 not impact thermal status across rectal, gastrointestinal or surface temperature or respiration rates  
45 measured ( $P > 0.05$ ). These data contradict the commonly held theory that dogs with darker coat  
46 color may experience a greater thermal change when exposed to direct sunlight compared to  
47 dogs with a lighter coat color.

48

49 **Keywords:** Canine, Labradors, Thermal Stress, Heat Stress, Dog, Thermal Imaging,  
50 Temperature, Coat Color

51

## 52 **Introduction**

53           Darker coat color has been suggested as a potential risk factor for heat injury in dogs in  
54 several publications [1-4] However, little evidence is available to support this theory, and a  
55 majority of these claims appear in the introduction or discussion sections of publications, or in  
56 review articles, with no supporting data. One study in Greyhounds reported higher rectal  
57 temperatures in darker colored dogs following exercise but utilized greater numbers of males in  
58 the darker coat participant group. These males were significantly larger in size than their female  
59 cohorts, so it is not known if sex or size played a role in their results. In addition, the darker  
60 colored group (n = 166) had more than twice the number of the light coated group (n = 63)  
61 which may have impacted the outcome [5]. In another study using Newfoundland dogs, researchers  
62 tested patches of white and black fur exposed to heat lamps. Authors measured the microclimate of the  
63 dog's coat and reported no significant difference in temperature between white and black fur regions  
64 on the dogs [6]. However, this study did not examine two separate groups of dogs with single coat  
65 colors (i.e. solid black or white).

66           Work in cattle has demonstrated an impact on thermal status associated with coat color, but  
67 this has not been thoroughly investigated in dogs. Increased solar absorption in darker coated cattle  
68 has been demonstrated to increase overall heat gain [7]. Darker cattle exposed to direct sunlight had a  
69 surface temperature gain of 4.8 °C, while lighter cattle only increased surface temperature by 0.7°C  
70 [8]. Additionally, this study reported increased incidence of elevated surface temperature, respiration,  
71 sweating, and heat stress signals in darker colored cattle compared to lighter colored cattle.

72           The risk of thermal injury to dogs is of significant concern to the veterinary community and is  
73 considered a common occurrence especially during the summer months. Evidence to validate the

74 ideas surrounding coat color as a risk factor would be helpful in establishing a better understanding of  
75 any increased danger facing dark coated dogs. Assessment of risk for heat injury can only be  
76 accurately evaluated by studying dogs that incur heat injury in comparison to dogs that do not,  
77 whether prospectively or retrospectively. Prospective studies of this nature are inherently difficult to  
78 conduct as our current standards of ethics and animal stewardship generally preclude experimentally  
79 induced heat injury in dogs. In addition, given the relatively low incidence of naturally occurring heat  
80 injury in any given population of dogs, prospective studies relying on naturally occurring cases would  
81 require a significant amount of time to complete. Thus, risk of heat injury is primarily based on  
82 observations of normal thermoregulatory reactions to safe levels of thermal stress, typically induced  
83 by exercise. In this study, we exposed dogs of light and dark coat colors to mild exercise (i.e. loose  
84 leash walk) in direct sunlight to assess thermoregulatory reactions and measure various parameters  
85 associated with body temperature and thermoregulation. The objective of this research was to identify  
86 the impact of coat color on the thermal status of dogs exposed to direct sunlight and to measure the  
87 increase in temperature experienced by black dogs as compared to yellow dogs.

88

## 89 **Materials and Methods**

### 90 **Animals and Diets**

91 Institutional Animal Care and Use approval (protocol #18-022) was received from  
92 Southern Illinois University prior to initiation of the study. The study was conducted in mid-  
93 June in Carbondale, Illinois with seasonally typical environmental conditions (mean outdoor  
94 temperature  $29.34 \pm 1.76$  °C,  $84.81 \pm 3.17$  °F). Non-conditioned Labrador Retrievers (n = 16)  
95 from a single kennel and with similar genetics were recruited for participation in this study.  
96 “Non-conditioned” was determined as having daily exercise consisting of  $4 \pm 1$  hours of daily

97 group turnout but the absence of a specific conditioning or exercise program. All dogs  
98 utilized came from 2 litters to limit for genetic variability. Dogs had a mean age of  $2.73 \pm 1.86$   
99 years, mean weight  $26.6 \pm 3.32$  kg and a mean BCS of  $5.5 \pm 1.5$ . Study participants were maintained  
100 on a commercial kibble diet (Victor High Energy, Mid America Pet Food Mount Pleasant, Texas)  
101 and fed twice daily for 60 days prior to the study. All dogs were up to date on vaccinations (rabies,  
102 bordetella, DHLPP) and received a monthly standardized parasite control regimen (Frontline Plus,  
103 Merial France) (Interceptor Plus, Elanco, Greenfield, IN). All study participants received a health  
104 screening by a licensed veterinarian prior to inclusion in the study and were also assigned a body  
105 condition score (BCS) by a trained researcher (Nestle Purina Petcare Company, St. Louis, MO).  
106 Following this exam, one canine was excluded from participation due to a previously undiagnosed  
107 dermal condition. Dogs of opposite colors were paired according to sex and BCS for participation.

## 108 **Phases**

109 The study was separated into three phases. Phase 1 (Baseline) included housing of each dog  
110 for 30 uninterrupted minutes in a climate-controlled room in individual crates. Phase 2 (Sunlight)  
111 consisted of 30 minutes of loose leash walking at a controlled pace in an uncovered outdoor sandy  
112 arena measuring 30m by 60m. The study concluded with Phase 3 (Cooling) and incorporated a 15-  
113 minute rest in a climate-controlled room in individual crates. All dogs were monitored throughout the  
114 study by veterinary staff stationed in the center of the outdoor arena and climate-controlled holding  
115 area, and all dogs were allowed ad libitum access to water while in their crates during both the  
116 Baseline and Cooling phases of the study.

117 Environmental conditions in the outdoor arena and in the climate-controlled room were  
118 monitored (Accurite Wireless Weather Station, Chaney Instrument Co. Lake Geneva, WI) to record  
119 temperature, humidity and heat index every five minutes.

## 120 **Data Collection**

121 Thermal status data for each dog were captured immediately following each of the three  
122 phases utilizing four methods as shown in Fig 1. Gastrointestinal (GI) data were captured using an  
123 ingestible thermistor orally administered (CorTemp, CorTemp Inc, Palmetto, FL) 30 minutes  
124 ( $\pm 15$ ) prior to the Baseline phase. GI temperatures were monitored with a handheld wireless  
125 reader (CorTemp, HQInc Palmetto, FL.). GI temperature was recorded in triplicate for each data  
126 collection period to ensure accuracy and the mean was utilized for statistical analysis. Rectal  
127 measurements were collected in tandem, using calibrated, 8second digital thermometers  
128 (American Diagnostics Company ADTEMP II model #413B) inserted to a depth of  
129 approximately 2 cm with petroleum jelly to minimize canine discomfort. Thermal images of  
130 participants were captured using a forward-looking infrared thermal camera (FLIR T400 thermal  
131 camera) at an approximate distance of 2 meters from the canine to capture body surface  
132 temperature as previously described [9-12]. To reduce the effects of environmental factors, all  
133 images were captured in an enclosed area with no exposure to wind or direct sunlight. Thermal  
134 images were analyzed using thermography software (ThermaCam Researcher Professional 2.9,  
135 FLIR Systems Inc. Wilson, OR, USA) to determine body surface temperature at the left eye  
136 and caudal abdomen as described previously [13-15] with examples shown in Fig 2.

137  
138 **Fig 1.** Pictogram representing the phases and points of data collection.

139  
140  
141 **Fig 2.** Thermography<sup>1</sup> depicting Baseline<sup>2</sup> (left) and Sunlight<sup>3</sup> (right) values for Labrador Black  
142 6. The two areas of interest were left eye<sup>4</sup> and left caudal abdomen<sup>5</sup>.

143  
144  
145 Digital video was utilized to record respiration rates (GoPro Camera, GoPro Inc. San  
146 Mateo, Ca) for 30 seconds at the start of each data collection period prior to rectal temperature

147 monitoring. The head, face, and tongue were captured and later played back in slow motion to  
148 count respiration during this 30 second period. A single independent observer was utilized  
149 throughout all canine respiration videos to minimize observer bias. Respiration was calculated as  
150 breaths per minute (BPM) = 30-second respiration x 2.

## 151 **Statistical Analysis**

152 All data were analyzed using SAS version 9.4 (SAS Institute Inc., Cary, NC). Each  
153 phase (baseline, sunlight, cooling) was examined using a Proc Glm repeated measures test.  
154 Baseline and Sunlight temperatures were examined using a paired t test to identify main effects  
155 of coat color and sex for dependent variables including rectal, gastrointestinal, surface  
156 temperature, respiration rate, and water consumption.

157 Additionally, a multivariate ANOVA was utilized to identify differences associated with the  
158 interactions of coat color and sex on rectal, gastrointestinal, body surface temperature,  
159 respiration, and water consumption. Water consumption throughout the data collection period  
160 was calculated as: Water offered – Water remaining = Water consumed

161 Return to baseline was identified as having achieved a cooling phase temperature within 0.5°F of the  
162 dog's initial baseline temperature using the below equations. If the cooling phase temperature had  
163 fallen to within 0.5°F, it was deemed “yes” the dog returned to a baseline temperature. The following  
164 equation was utilized:

$$165 \quad \text{Baseline} - \text{Cooling} \leq 0.5^{\circ}\text{F} = \text{Return to Baseline (Yes)}$$

$$166 \quad \text{Baseline} - \text{Cooling} \geq 0.5^{\circ}\text{F} = \text{Return to Baseline (No)}$$

167 Return to baseline was reported as Yes or No and was analyzed using the Proc Freq procedure of SAS  
168 (chi square) to examine differences coat color and sex. Significance for all outcomes was established  
169 at  $P < 0.05$ .

170

## 171 Results

172 Following 30 minutes of walking in direct sunlight, rectal temperatures increased by 1.88°C in  
 173 black dogs, and 1.83 °C in yellow coated dogs (P< 0.0001). Similarly, GI temperatures  
 174 increased by 1.89 °C in black coated dogs, and 1.94 °C in the yellow group, (P < 0.0001) as  
 175 shown in Fig 3. Eye surface temperature increased by 2.8 °C black and 1.93 °C yellow (P <  
 176 0.005) and abdominal surface temperature increased by 2.93 °C black and 2.35 °C yellow (P <  
 177 0.0001). See Figs 3-4, Table 1. No significant temperature difference was noted between black  
 178 and yellow Labradors across all phases.

179 **Fig 3.** Mean change in rectal<sup>1</sup> and gastrointestinal temperature (GI)<sup>2</sup> across three phases in non-  
 180 conditioned Labradors.

181

182 **Fig 4.** Mean change in body surface temperature measured by thermography<sup>1</sup> at the eye<sup>2</sup> and  
 183 abdomen<sup>3</sup> in non-conditioned Labradors

184

185 **Table 1.** Mean values of thermal status indicators<sub>1</sub> across three phases (Baseline<sup>2</sup>, Sunlight<sup>3</sup>, Cooling<sup>4</sup>) in  
 186 Labradors grouped by coat color.

| Variable                   | Color  | Baseline                                      | P-value | Sunlight                                   | P-value | Cooling                                                 | P-value |
|----------------------------|--------|-----------------------------------------------|---------|--------------------------------------------|---------|---------------------------------------------------------|---------|
| <b>Rectals<sub>5</sub></b> | Black  | 38.44±0.37 °C<br><sup>a</sup><br>101.2±0.7 °F | 0.8404  | 40.3±0.41 °C <sup>b</sup><br>104.5±0.8 °F  | 0.9354  | 39.46±0.34 °C <sup>c</sup><br>103±0.6 °F                | 0.4673  |
|                            | Yellow | 38.51±0.52 °C<br><sup>a</sup><br>101.3±1.0 °F |         | 40.31±0.34 °C <sup>b</sup><br>104.6±0.6 °F |         | 39.43±0.30 °C <sup>c</sup><br>102.8±0.4 °F              |         |
| <b>GI<sub>6</sub></b>      | Black  | 38.76±0.25 °C<br><sup>a</sup><br>101.8±0.5 °F | 0.6279  | 40.68±0.47 °C <sup>b</sup><br>105.2±0.9 °F | 0.8286  | 39.2±0.6 °C <sup>c</sup><br>102.6±1.1 °F                | 0.8153  |
|                            | Yellow | 38.66±0.48 °C<br><sup>a</sup><br>101.6±0.9 °F |         | 40.61±0.21 °C <sup>b</sup><br>105.1±0.4 °F |         | 39.29±0.26 °C <sup>c</sup><br>102.6±0.5 °C <sup>c</sup> |         |
| <b>Eye<sub>7</sub></b>     | Black  | 36.09±0.57 °C<br><sup>a</sup><br>97.0±1.1 °F  | 0.0934  | 38.89±0.42 °C <sup>b</sup><br>102.0±0.8 °F | 0.3004  | 37.4±0.5 °C <sup>c</sup><br>99.3±0.96 °F                | 0.0973  |



|                                |        |                                           |        |                                            |        |                                          |        |
|--------------------------------|--------|-------------------------------------------|--------|--------------------------------------------|--------|------------------------------------------|--------|
|                                | Yellow | 36.68±0.55 °C <sup>a</sup><br>98.0±1.1 °F |        | 38.6±0.54 °C <sup>b</sup><br>101.5±1.0 °F  |        | 36.9±0.51 °C <sup>c</sup><br>98.4±1.0 °F |        |
| <b>Abdominal<sub>8</sub></b>   | Black  | 36.24±0.91 °C <sup>a</sup><br>97.2±1.7 °F | 0.7763 | 39.15±0.73 °C <sup>b</sup><br>102.5±1.4 °F | 0.0908 | 37.4±0.5 °C <sup>c</sup><br>100.7±1.3 °F | 0.1002 |
|                                | Yellow | 36.01±1.44 °C <sup>a</sup><br>96.9±2.9 °F |        | 38.4±0.75 °C <sup>b</sup><br>101.1±1.5 °F  |        | 36.9±0.51 °C <sup>c</sup><br>99.6±1.2 °F |        |
| <b>Respiration<sub>9</sub></b> | Black  | 123.3±20.5 <sup>a</sup>                   | 0.7206 | 270.5±40.2 <sup>b</sup>                    | 0.744  | 241.7±24.5 <sup>c</sup>                  | 0.2998 |
|                                | Yellow | 132.9±40.7 <sup>a</sup>                   |        | 276.6±28.2 <sup>b</sup>                    |        | 216.4±59.7 <sup>c</sup>                  |        |

187

188 \*Notes a significant difference observed by coat color

189 <sup>a,b,c</sup>Notes a significant difference observed by phase

190 <sup>1</sup>Thermal status indicators including rectal, gastrointestinal, eye and abdominal temperature

191 <sup>2</sup>Baseline occurred 30 minutes prior to sunlight exposure (sunlight) and recorded initial measurements

192 <sup>3</sup>Sunlight phase consisted of 30 minutes of active walking in a sunny outdoor area on a leash

193 <sup>4</sup>Cooling phase occurred 15 minutes after walking in a climate-controlled room with water

194 <sup>5</sup>Rectal temperature was recorded by inserting thermometer to a depth of approximately 2 cm with petroleum jelly

196 <sup>6</sup>GI (gastrointestinal) temperature was recorded with an ingestible thermistor CorTemp 30 minutes prior to baseline

198 <sup>7</sup>Eye temperature was captured using thermography FLIR T400 at the left eye

199 <sup>8</sup>Abdominal temperature was captured using thermography FLIR T400 at the left caudal abdomen

200 <sup>9</sup>Respiration rate was captured for 30 seconds utilizing a GoPro, depicted as breaths per minute (bpm)

201

202 Similarly, all temperature measurements significantly decreased from sunlight to cooling

203 phase. Following cessation of cooling phase, rectal temperatures decreased by 0.84°C black and 1.0

204 °C yellow (P< 0.0001) and GI temperatures decreased 1.45 C in black dogs and 1.33 in yellow

205 dogs (P< 0.0001) as shown in Fig 3. Thermal eye surface temperature decreased 1.49 °C in black

206 and 1.71 °C in yellow dogs (P < 0.005), and abdominal surface temperature decreased by 1.0 °C

207 black and 0.85 °C yellow (P < 0.0001) as shown in Fig 4. A similar change in respiration rates

208 was shown across both coat colors of Labradors, meaning that coat color did not significantly

209 impact breathing rates across phases (P > 0.05), as shown in Fig 5.

210

211 **Fig 5.** Mean change in respiration rates<sup>1</sup> across three phases in non-conditioned Labradors.

212

213

214 Exposure to walking in sunlight significantly increased the rectal (1.84°C), GI (1.94°C), eye  
 215 surface (2.41°C) and abdominal surface (2.67°C) temperatures of all dogs when Baseline and  
 216 Sunlight temperatures were compared ( $P < 0.0001$ ). Furthermore, returning to the climate-  
 217 controlled room significantly decreased the rectal (0.7°C), GI (1.41°C), eye surface (1.58°C), and  
 218 abdominal surface (0.92°C) temperature of all dogs ( $P < 0.0001$ ).

219  
 220 After completion of 30 minutes in direct sunlight walking, both males and females saw a similar  
 221 increase across all temperatures, rectal (1.83°C male, 1.84°C female), GI (2.04°C male, 1.87°C  
 222 female), eye surface (2.3°C 2 male, 2.5°C female) and abdominal surface (2.93°C male and 2.5  
 223 °C female). A similar fall in temperatures for both sexes was seen after 15 minutes of passive  
 224 cooling, rectal (0.92°C male, 0.89°C female), GI (1.32°C male, 1.47°C female), eye surface  
 225 (1.62°C male, 1.57°C female), and abdominal surface (1.0°C male, 0.87°C female) as shown in  
 226 Figures 6-7, Table 2.

227  
 228 **Fig 6.** Mean change in rectal<sup>1</sup> and gastrointestinal temperature (GI)<sup>2</sup> across three phases in non-  
 229 conditioned Labradors.

230  
 231 **Fig 7.** Mean change in surface temperature measured by thermography<sup>1</sup> at the eye<sup>2</sup> and  
 232 abdomen<sup>3</sup> in non-conditioned Labradors across three phases.

233  
 234 **Table 2.** Mean values of thermal<sup>1</sup> status indicators across three phases (Baseline<sup>2</sup>,  
 235 Sunlight<sup>3</sup>, Cooling<sup>4</sup>) in Labradors grouped by sex.

| VARIABLE            | SEX    | BASELINE                                   | P-VALUE | SUNLIGHT                                   | P-VALUE | COOLING                                    | P-VALUE |
|---------------------|--------|--------------------------------------------|---------|--------------------------------------------|---------|--------------------------------------------|---------|
| RECTAL <sub>5</sub> | Male   | 38.52±0.35 °C <sup>a</sup><br>101.3±0.7°F  | 0.8536  | 40.35±0.31 °C <sup>b</sup><br>104.6±0.6 °F | 0.6991  | 39.43±0.3 °C <sup>c</sup><br>103±0.6 °F    | 0.7511  |
|                     | Female | 38.44±.5 °C <sup>a</sup><br>101.2±0.9 °F   |         | 40.28±0.41 °C <sup>b</sup><br>104.5±0.8 °F |         | 39.39±0.27 °C <sup>c</sup><br>102.9±0.5 °F |         |
| GI <sub>6</sub>     | Male   | 38.68±0.36 °C <sup>a</sup><br>101.7±0.7 °F | 0.9407  | 40.72±0.21 °C <sup>b</sup><br>105.3±0.4 °F | 0.6005  | 39.4±0.41 °C <sup>c</sup><br>102.9±0.8 °F  | 0.3736  |
|                     | Female | 38.73±0.39 °C <sup>a</sup><br>101.7±0.7 °F |         | 40.6±0.44 °C <sup>b</sup><br>105.1±0.9 °F  |         | 39.13±0.49 °C <sup>c</sup><br>102.4±0.9 °F |         |

|                                |        |                                           |        |                                            |        |                                            |        |
|--------------------------------|--------|-------------------------------------------|--------|--------------------------------------------|--------|--------------------------------------------|--------|
| <b>EYE<sub>7</sub></b>         | Male   | 36.58±0.64 °C <sup>a</sup><br>97.9±1.3 °F | 0.2509 | 38.9±0.14 °C <sup>b</sup><br>102.0±0.3 °F  | 0.3087 | 37.28±0.5 °C <sup>c</sup><br>99.1±1.0 °F   | 0.5457 |
|                                | Female | 36.16±0.57 °C <sup>a</sup><br>97.1±1.1 °F |        | 38.66±0.62 °C <sup>b</sup><br>101.6±1.2 °F |        | 37.09±0.59 °C <sup>c</sup><br>98.8±1.1 °F  |        |
| <b>ABDOMINAL<sub>8</sub></b>   | Male   | 36.2±0.95 °C <sup>a</sup><br>97.2±2.0 °F  | 0.8360 | 39.13±0.34 °C <sup>b</sup><br>102.4±0.7 °F | 0.1674 | 38.13±0.45 °C <sup>c</sup><br>100.6±0.9 °F | 0.9533 |
|                                | Female | 36.09±1.33 °C <sup>a</sup><br>97.0±2.5 °F |        | 38.58±0.97 °C <sup>b</sup><br>101.4±1.9 °F |        | 37.71±0.81 °C <sup>c</sup><br>99.9±1.5 °F  |        |
| <b>RESPIRATION<sub>9</sub></b> | Male   | 124.0±50.3 <sup>a</sup>                   | 0.8203 | 274.0±34.4 <sup>b</sup>                    | 0.9533 | 225.3±33.9 <sup>c</sup>                    | 0.8553 |
|                                | Female | 130.2±51.4 <sup>a</sup>                   |        | 272.9±35.9 <sup>b</sup>                    |        | 230.1±56.0 <sup>c</sup>                    |        |

236

237 \*Notes a significant difference observed by sex

238 <sup>a,b,c</sup> Notes a significant difference observed by phase

239 <sup>1</sup>Thermal status indicators including rectal, gastrointestinal, eye and abdominal temperature

240 <sup>2</sup>Baseline occurred 30 minutes prior to sunlight exposure (sunlight) and recorded initial measurements

241 <sup>3</sup>Sunlight phase consisted of 30 minutes of active walking in a sunny outdoor area on a leash

242 <sup>4</sup>Cooling phase occurred 15 minutes after walking in a climate-controlled room with water

243 <sup>5</sup>Rectal temperature was recorded by inserting a thermometer rectally 2cm

244 <sup>6</sup>GI (gastrointestinal) temperature was recorded with an ingestible thermistor CorTemp 30 minutes prior to baseline

245 <sup>7</sup>Eye temperature was captured using thermography FLIRT400 at the left eye

246 <sup>8</sup> Abdominal temperature was captured using thermography FLIR T400 at the left caudal abdomen

247 <sup>9</sup>Respiration rate was captured for 30seconds utilizing a GoPro, depicted as breaths per minute(bpm)

248

249

250 Across all phases of the study, sex did not show a significant effect on respiration rates

251 of the Labradors, with both sexes showing a similar increase and decrease in bpm ( $P > 0.05$ ), as

252 shown in Fig 8.

253

254 **Fig 8.** Mean change in respiration rates<sup>1</sup> across three phases in non-conditioned Labradors.

255

256

257 No effect of coat color ( $P = 0.5560$ ) or sex ( $P = 0.9806$ ) was seen for water consumption

258 with black dogs consuming 173.75± 195.3 ml and yellow dogs consuming

259 221.21±57.1 ml.

260

261 No effect of coat color was noted when rectal temperatures were examined for a return to

262 baseline in 12.5% and 28.6% of black and yellow dogs respectively, ( $P = 0.5692$ ). Similarly, GI

263 temperatures returned to baseline 50% of black and 42.9% of yellow dogs ( $P = 1.00$ ) and

264 abdominal surface temperature with 12.5% black and 28.6% yellow dogs ( $P = 0.6080$ ) returning

265 to baseline values. Conversely, coat color did impact the dog's return to baseline when eye  
266 surface temperature was examined with 12.5% black and 71.4% yellow dogs achieving baseline  
267 values after their Cooling phase, as shown in Table 3 (P = 0.0406).

268  
269 **Table 3.** Return to baseline<sup>1</sup> rectal<sup>2</sup>, gastrointestinal<sup>3</sup> (GI), thermal eye<sup>4</sup>, and thermal abdominal<sup>5</sup>  
270 temperatures by coat color and sex.

271

| VARIABLE  | BLACK | YELLOW | P-VALUE | MALE  | FEMALE | P-VALUE |
|-----------|-------|--------|---------|-------|--------|---------|
| RECTAL    | 12.5% | 28.6%  | 0.5692  | 16.7% | 22.2%  | 1.00    |
| GI        | 50%   | 42.9%  | 1.00    | 33.3% | 55.6%  | 0.6084  |
| EYE       | 12.5% | 71.4%  | 0.0406* | 50%   | 33.3%  | 0.2286  |
| ABDOMINAL | 12.5% | 28.6%  | 0.6080  | 0%    | 33.3%  | 0.6080  |

272  
273 \*Notes a significant difference between groups  
274 <sup>1</sup>Return to Baseline occurred when cooling temperature returned within 0.5°F of the initial baseline temperature  
275 reading measured 30 min prior to sunlight exposure (sunlight  
276 <sup>2</sup>Rectal temperature was recorded by inserting a thermometer in 2cm rectally  
277 <sup>3</sup>GI (gastrointestinal) temperature was recorded with an ingestible thermistor CorTemp 30 minutes prior to baseline  
278 <sup>4</sup>Eye temperature was captured using thermography FLIR T400 at the left eye  
279 <sup>5</sup>Abdominal temperature was captured using thermography FLIR T400 at the left caudal abdomen

280  
281 Sex did not influence cooling as rectal temperatures returned to baseline in 22.2% and 16.7% of  
282 female and male dogs respectively (P =1.00). Temperatures for the GI tract returned to baseline  
283 in 55.6% of female and 33.3% of male dogs (P =0.6084).

284 Similarly, no effect of sex was observed for cooling of surface temperatures measured at  
285 the caudal abdomen with 33.3% of female and 0% of male dogs returning to baseline values (P  
286 = 0.6080). Eye surface temperature returned to baseline in 33.3% female and 50% of male dogs  
287 achieving baseline values after their Cooling phase (P = 0.2286), as shown in Table 3.

## 288 289 **Discussion**

290 Black dogs did not demonstrate a difference in temperature following exposure to  
291 direct sunlight when compared to yellow dogs for any of the parameters we examined,

292 including rectal thermometer using a standard medical-grade predictive digital thermometer,  
293 GI temperature using an ingestible thermistor, eye surface temperature and abdominal  
294 surface temperature using forward-looking infrared thermography, respiration or water  
295 consumption. Contradictory to currently held beliefs, all dogs experienced a similar rise  
296 in rectal, GI, surface temperature, and respiration from the baseline to the sunlight  
297 phase, with no difference shown between dark vs lighter coated dogs ( $P > 0.05$ ) as shown  
298 in Figures 3–5 and Table 1. Furthermore, no effect of sex was measured as both males  
299 and females demonstrated similar responses to sunlight exposure and cooling based on  
300 rectal, GI, eye surface, abdominal temperatures, and respiration rates ( $P > 0.05$ ) shown  
301 in Figures 6-8, and Table 2.

302 Contrary to the commonly held belief, our data demonstrated that black dogs did not  
303 experience a greater heat gain than their yellow counterparts. Similarly, there was no  
304 difference in the apparent thermoregulatory effect between dark and light dogs. This is  
305 particularly noteworthy because of the relative short duration of the walk and the significant  
306 temperature increase we observed in both dark and light-coated dogs. It is also interesting to  
307 note that the 15-minute cooling period was inadequate for 80% of the dogs to achieve  
308 baseline thermal status based on rectal measurements which are considered standard for  
309 recording accurate temperature in animal species [16] .

310 Conversely, almost 50% of each group was able to return to a baseline values via  
311 GI values after 15 minutes of cooling. This could be attributed to water consumption  
312 during the cooling phase affecting the CorTemp capsule reading. [17] However, it is  
313 important to note that all dogs did experience a significant decrease in their rectal, GI,  
314 eye and abdominal temperatures, and respiration rates. Future work should include

315 studies with a longer cooling period to determine that time frame necessary for  
316 non-conditioned dogs to achieve baseline thermal status following thermal stress.  
317 The data presented here are inconsistent with the previous study examining racing  
318 greyhounds with larger proportions of dark coated dogs having higher rectal  
319 temperatures after racing [5] . Key differences between this study and the prior study on  
320 Greyhounds include controlled coat color (black or yellow vs. multiple light or dark  
321 colors), tighter grouping of age and sex, and a controlled time period and consistent  
322 environment. However, there were fewer dogs in our study compared to the study on  
323 Greyhounds (16 vs. 229). Power calculations indicate that it would take more than 500 dogs  
324 to adequately test this question using an alpha of 0.05 and 80% power. That number of dogs  
325 is beyond our capacity. Furthermore, the greyhounds utilized in the previous study were  
326 considerably more fit than the non-conditioned dogs used in our study. Fitness level can  
327 impact thermal response as previously demonstrated in working canines [18, 19] and  
328 should be examined as a controlled factor in future work.

329         Infrared thermal cameras have been widely used in livestock species to identify  
330 changes in the surface temperature of the animals. These studies focused on areas that  
331 had more skin exposure for more accurate data, such as the flank, eye, and facial region.  
332 In our canine study, thermal images were captured inside a building to reduce effects  
333 from wind, sun, and other environmental exposures. Both yellow and black dogs showed  
334 similar changes in body surface temperatures which does not support the idea that coat  
335 color is a potential risk factor for thermal stress. A comparison of skin surface  
336 temperature during exposure to sunlight in dogs is warranted. There were some  
337 challenges associated with the capture of the thermal imaging. Although the baseline

338 photos were captured with little difficulty, many of the dogs were hot following the  
339 sunlight exposure and several were non-compliant in assuming the same posture. More  
340 obedient/compliant dogs would prove better subjects for this nature of study.

341 In designing the study, we considered that if body temperature measurements  
342 were similar between the dark and light coated dogs, perhaps dark coated dogs simply  
343 undertook increased efforts of thermoregulation such as increased respiration (i.e.  
344 panting) or increased water consumption. However, we found no difference in these  
345 parameters between the dark and light coated dogs, suggesting that the effort they  
346 expended to thermoregulation was also similar. A key limitation in our study is that we  
347 did not record heart rate, which would be important in assessment of thermoregulatory  
348 response. More sophisticated instrumentation and monitoring would be important in  
349 further studies to determine if more subtle physiological changes were occurring with  
350 thermoregulation.

351 Novel data produced by this work include an absence of significant difference in  
352 body temperature between black or yellow coated dogs. The techniques utilized to assess  
353 temperature, panting and water consumption are non-technical, readily available methods  
354 for canine handlers or owners to assess thermal status of dogs in the field, and thus are  
355 important to prevention of heat related injury. These data provide critical evidence to dispute  
356 the theory that dark coat color is a risk factor for thermal stress which is reported across  
357 several forums including veterinary textbooks and previously published articles [1-4].  
358 In this experiment, dark and light-colored dogs exposed to the same environment  
359 showed a similar heat gain and loss (mean peak rectal  $40.31 \pm 0.37$  °C and mean peak GI  
360 temperatures  $40.65 \pm 0.37$  °C respectively). This study also showed that when these non-

361 conditioned dogs reached rectal temperatures near 40.9 °C (105.62 °F), and  
362 gastrointestinal temperatures near 42°C (106.16 °F), 15 minutes of rest in a cool room  
363 with water available for consumption is adequate to begin to decrease the temperature,  
364 although a return to baseline values may not be achieved within that time frame. No  
365 medical intervention or active cooling method was needed to decrease the dogs’  
366 temperature and nor heat-related negative health impacts were noted by the veterinary  
367 team on site, despite dogs reaching temperatures as high as 42°C (106.16 F).

368

## 369 **Ethical Conflicts**

370 The authors declare that they had no conflict of interest.

## 371 **Acknowledgements**

372 The authors would like to thank the undergraduate and graduate students of Southern Illinois  
373 University for their participation in this research. The researchers would also like to  
374 acknowledge SIT Service Dogs for contributing the use of their dogs for this project.

## 375 **Funding**

376 This study was partially supported by the USDA-ARS Biophotonics (Grant # 58-6402-  
377 3-018).

378

## 379 **References**

- 380 1. Flournoy S, Wohl J, Macintire D. Heatstroke in Dogs: Pathophysiology and Predisposing  
381 Factors. *Compend.* 2003;25:410–418.



- 382 2. Johnson SI, McMichael M, White G. Heatstroke in small animal medicine: A clinical  
383 practice review. *J Vet Emerg Crit Care*. 2006;16(112–119):10–1111.
- 384 3. Andress M, Goodnight M. Heatstroke in a Military Working Dog. *United States Army Med*  
385 *Dep Journal*. 2013; p. 34–37.
- 386 4. Carter AJ, Hall EJ. Investigating factors affecting the body temperature of dogs  
387 competing in cross country (canicross) races in the. *UK J Therm Biol*. 2018;72(33–  
388 38):10–1016.
- 389 5. McNicholl J, Howarth GS, Hazel SJ. Influence of the Environment on Body Temperature  
390 of Racing Greyhounds. *Front Vet Sci*. 2016;3(1–13):10–3389.
- 391 6. Chesney CJ. The microclimate of the canine coat: The effects of heating on coat and skin  
392 temperature and relative humidity. *Vet Dermatol*. 1997;8:183–190.
- 393 7. Finch VA, Bennett IL, Holmes CR. Coat colour in cattle: effect on thermal balance,  
394 behaviour and growth, and relationship with coat type. *J Agric Sci*. 1984;102(141).
- 395 8. Hillman PE, Lee CN, Carpenter JR, Baek KS, Parkhurst A. Impact of Hair Color on  
396 Thermoregulation of Dairy Cows to Direct Sunlight; *ASAE Annual Meeting*. 2001.
- 397 9. Church JS et al. Influence of environmental factors on infrared eye temperature  
398 measurements in cattle. *Res Vet Sci*. 2014;96(220–226):10–1016.
- 399 10. McManus C. et al., Infrared thermography in animal production: An overview. *Comput*  
400 *Electron Agric*. 2016;123:10–16.
- 401 11. Salles MSV, C S. Mapping the body surface temperature of cattle by infrared  
402 thermography. *J Therm Biol*. 2016;62(63–69):10–1016.
- 403 12. Rizzo M, Arfuso F, Alberghina D, Giudice E, Giancesella M, Piccione G. Monitoring  
404 changes in body surface temperature associated with treadmill exercise in dogs by use of

- 405 infrared methodology. *J Therm Biol.* 2017;69(64–68):10–1016.
- 406 13. Zanghi BM. Eye and Ear Temperature Using Infrared Thermography Are Related to  
407 Rectal Temperature in Dogs at Rest or With Exercise. *Front Vet Sci.* 2016;3(111).
- 408 14. Yanmaz LE, Doğan E, Okumuş Z, Şenocak MG, Yildirim F. Comparison of Rectal, Eye  
409 and Ear Temperatures in Kangal Breed Dogs. *Kafkas Univ Vet Fak Derg.* 2015;21(615–  
410 617):10–9775.
- 411 15. Gomart SB, Allerton FJW, Gommeren K. Accuracy of different temperature reading  
412 techniques and associated stress response in hospitalized dogs; *Journal of Veterinary  
413 Emergency and Critical Care.* 2014;24:279-285
- 414 16. Greer RJ, Cohn LA, Dodam JR, Wagner-Mann CC, Mann FA. Comparison of three  
415 methods of temperature measurement in hypothermic, euthermic, and hyperthermic dogs.  
416 *J Am Vet Med Assoc.* 2007;230:1841–1848.
- 417 17. Lewis S, Foster RC. Effect of Heat on Canines and Felines. *Iowa State Univ  
418 Veterinarian.* 1976;38:117–121.
- 419 18. Robbins PJ, Ramos MT, Zanghi BM, Otto CM. Environmental and Physiological Factors  
420 Associated with Stamina in Dogs Exercising in High Ambient Temperatures. *Front Vet  
421 Sci.* 2017;4(1–9):10–3389.
- 422 19. Baker JA, Davis MS. Effect of conditioning on exercise-induced hyperthermia and post-  
423 exercise cooling in dogs. *Comp Exerc Physiol.* 2018;14(91–97):10–3920.
- 424

**Fig 1.** Pictogram representing the phases and points of data collection.

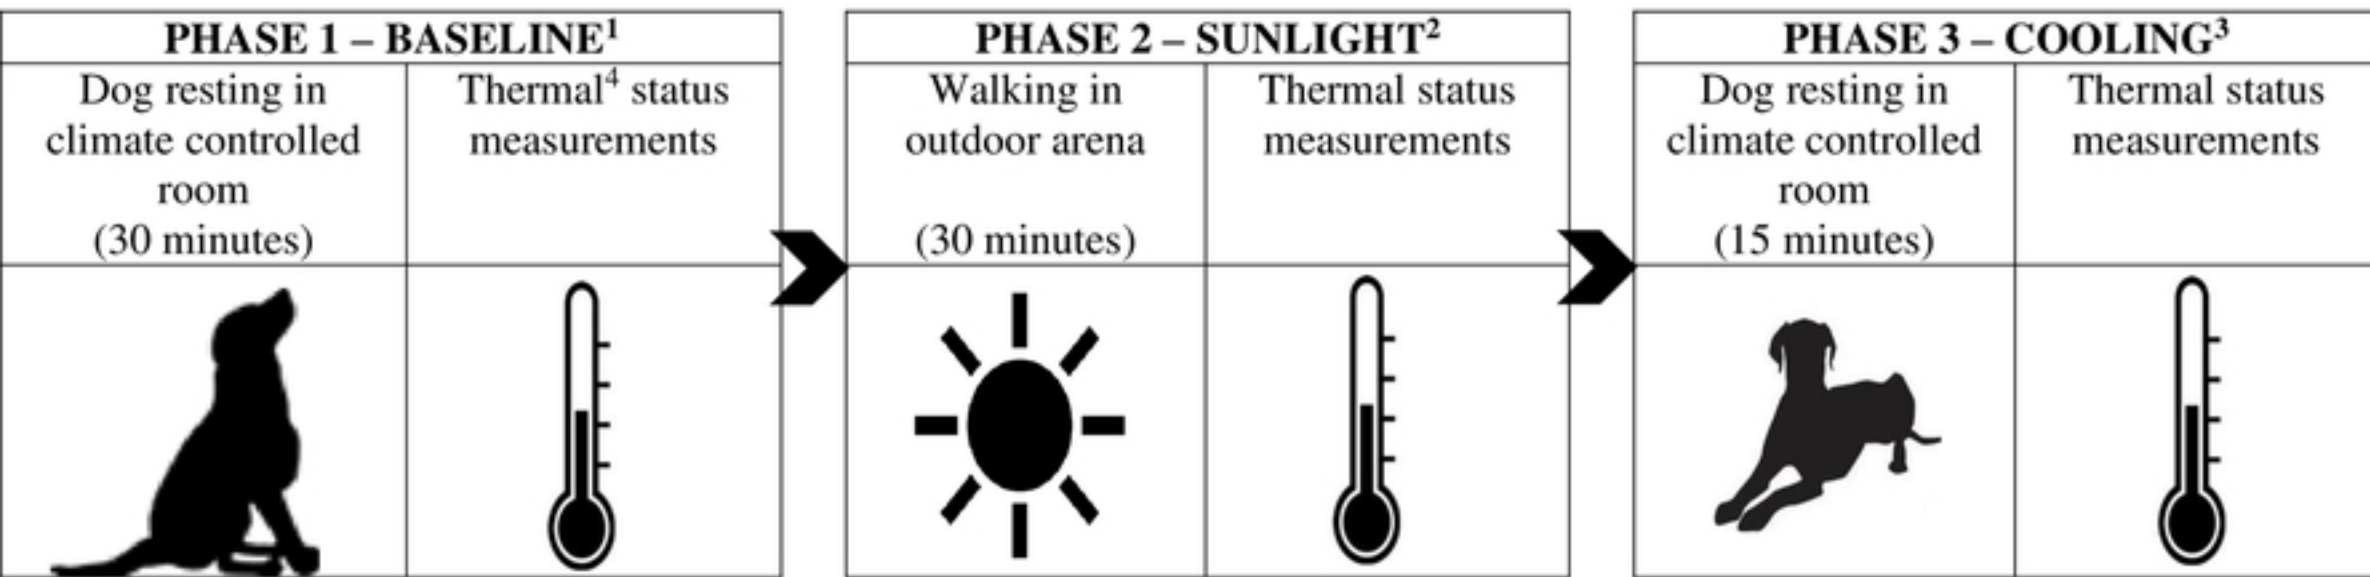

<sup>1</sup>Baseline occurred 30 minutes prior to sunlight exposure (sunlight) and recorded initial measurements

<sup>2</sup>Sunlight phase consisted of 30 minutes of controlled pace walking in a sunny outdoor area on a leash

<sup>3</sup>Cooling phase occurred 15 minutes after walking in a climate-controlled room with water

<sup>4</sup>Thermal status measurements consisted of rectal, gastrointestinal, eye surface, abdominal surface temperature, and respiration rate

**Figure 1**

**Fig 2.** Thermography<sup>1</sup> depicting Baseline<sup>2</sup> (left) and Sunlight<sup>3</sup> (right) values for Labrador Black 6. The two areas of interest were left eye<sup>4</sup> and left caudal abdomen<sup>5</sup>.

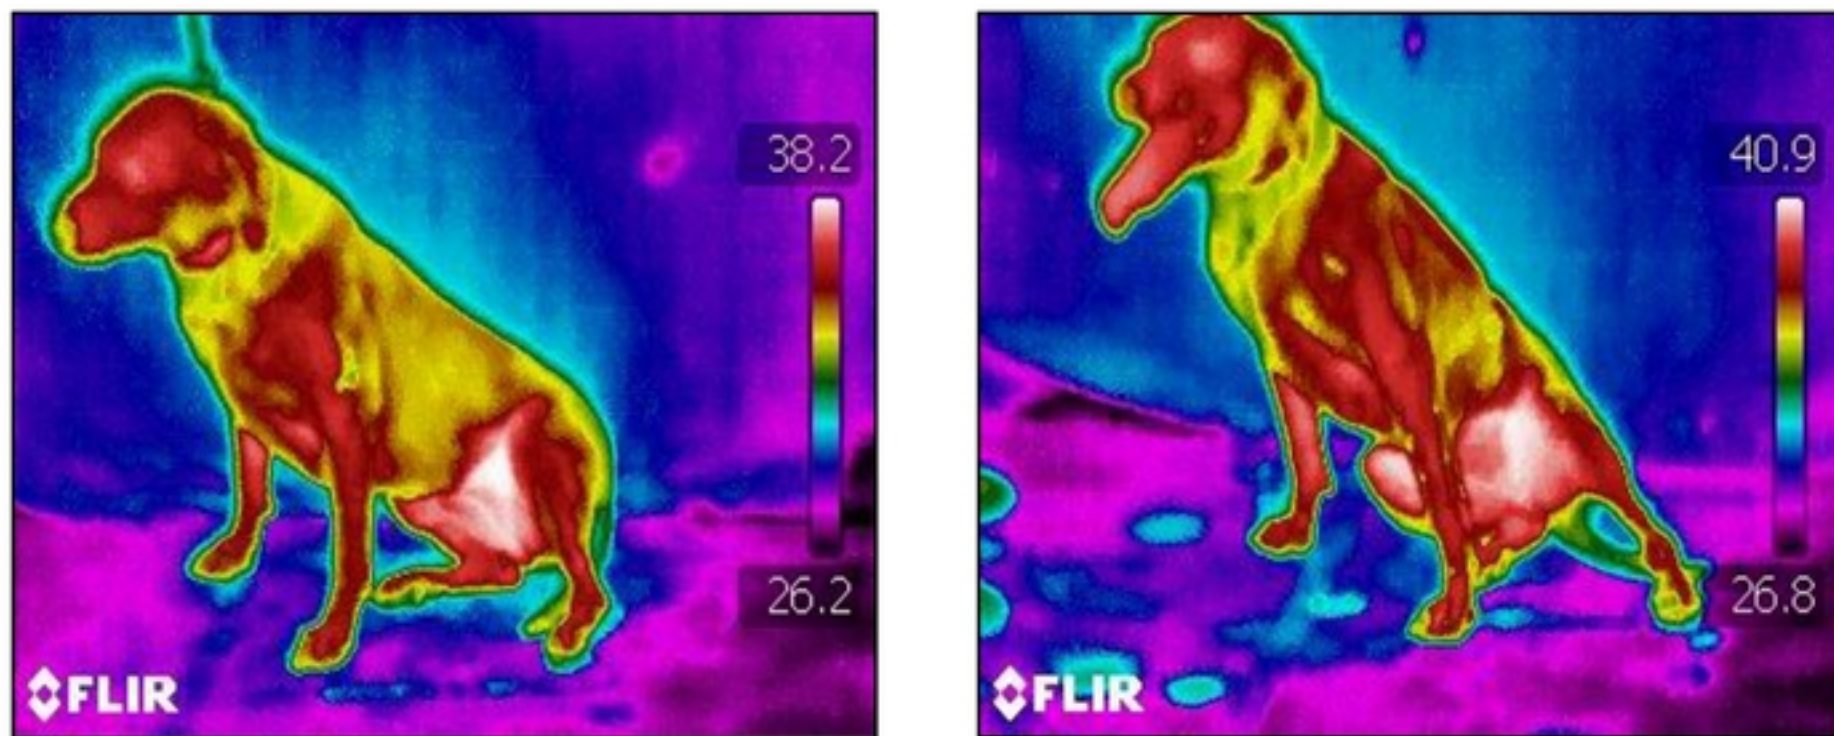

<sup>1</sup>Thermography captured using FLIR T400. Peak values noted at the top of the color legend at the right of each image.

<sup>2</sup>Baseline occurred 30 minutes prior to sunlight exposure (sunlight) and recorded initial measurements

<sup>3</sup>Sunlight phase consisted of 30 minutes of active walking in a sunny outdoor area on a leash

<sup>4</sup>Eye thermal temperature has been correlated with rectal temperature.

<sup>5</sup>Abdominal temperature has been correlated with rectal temperature.

Figure 2



**Fig 3.** Mean change in rectal<sup>1</sup> and gastrointestinal temperature (GI)<sup>2</sup> across three phases in non-conditioned Labradors.

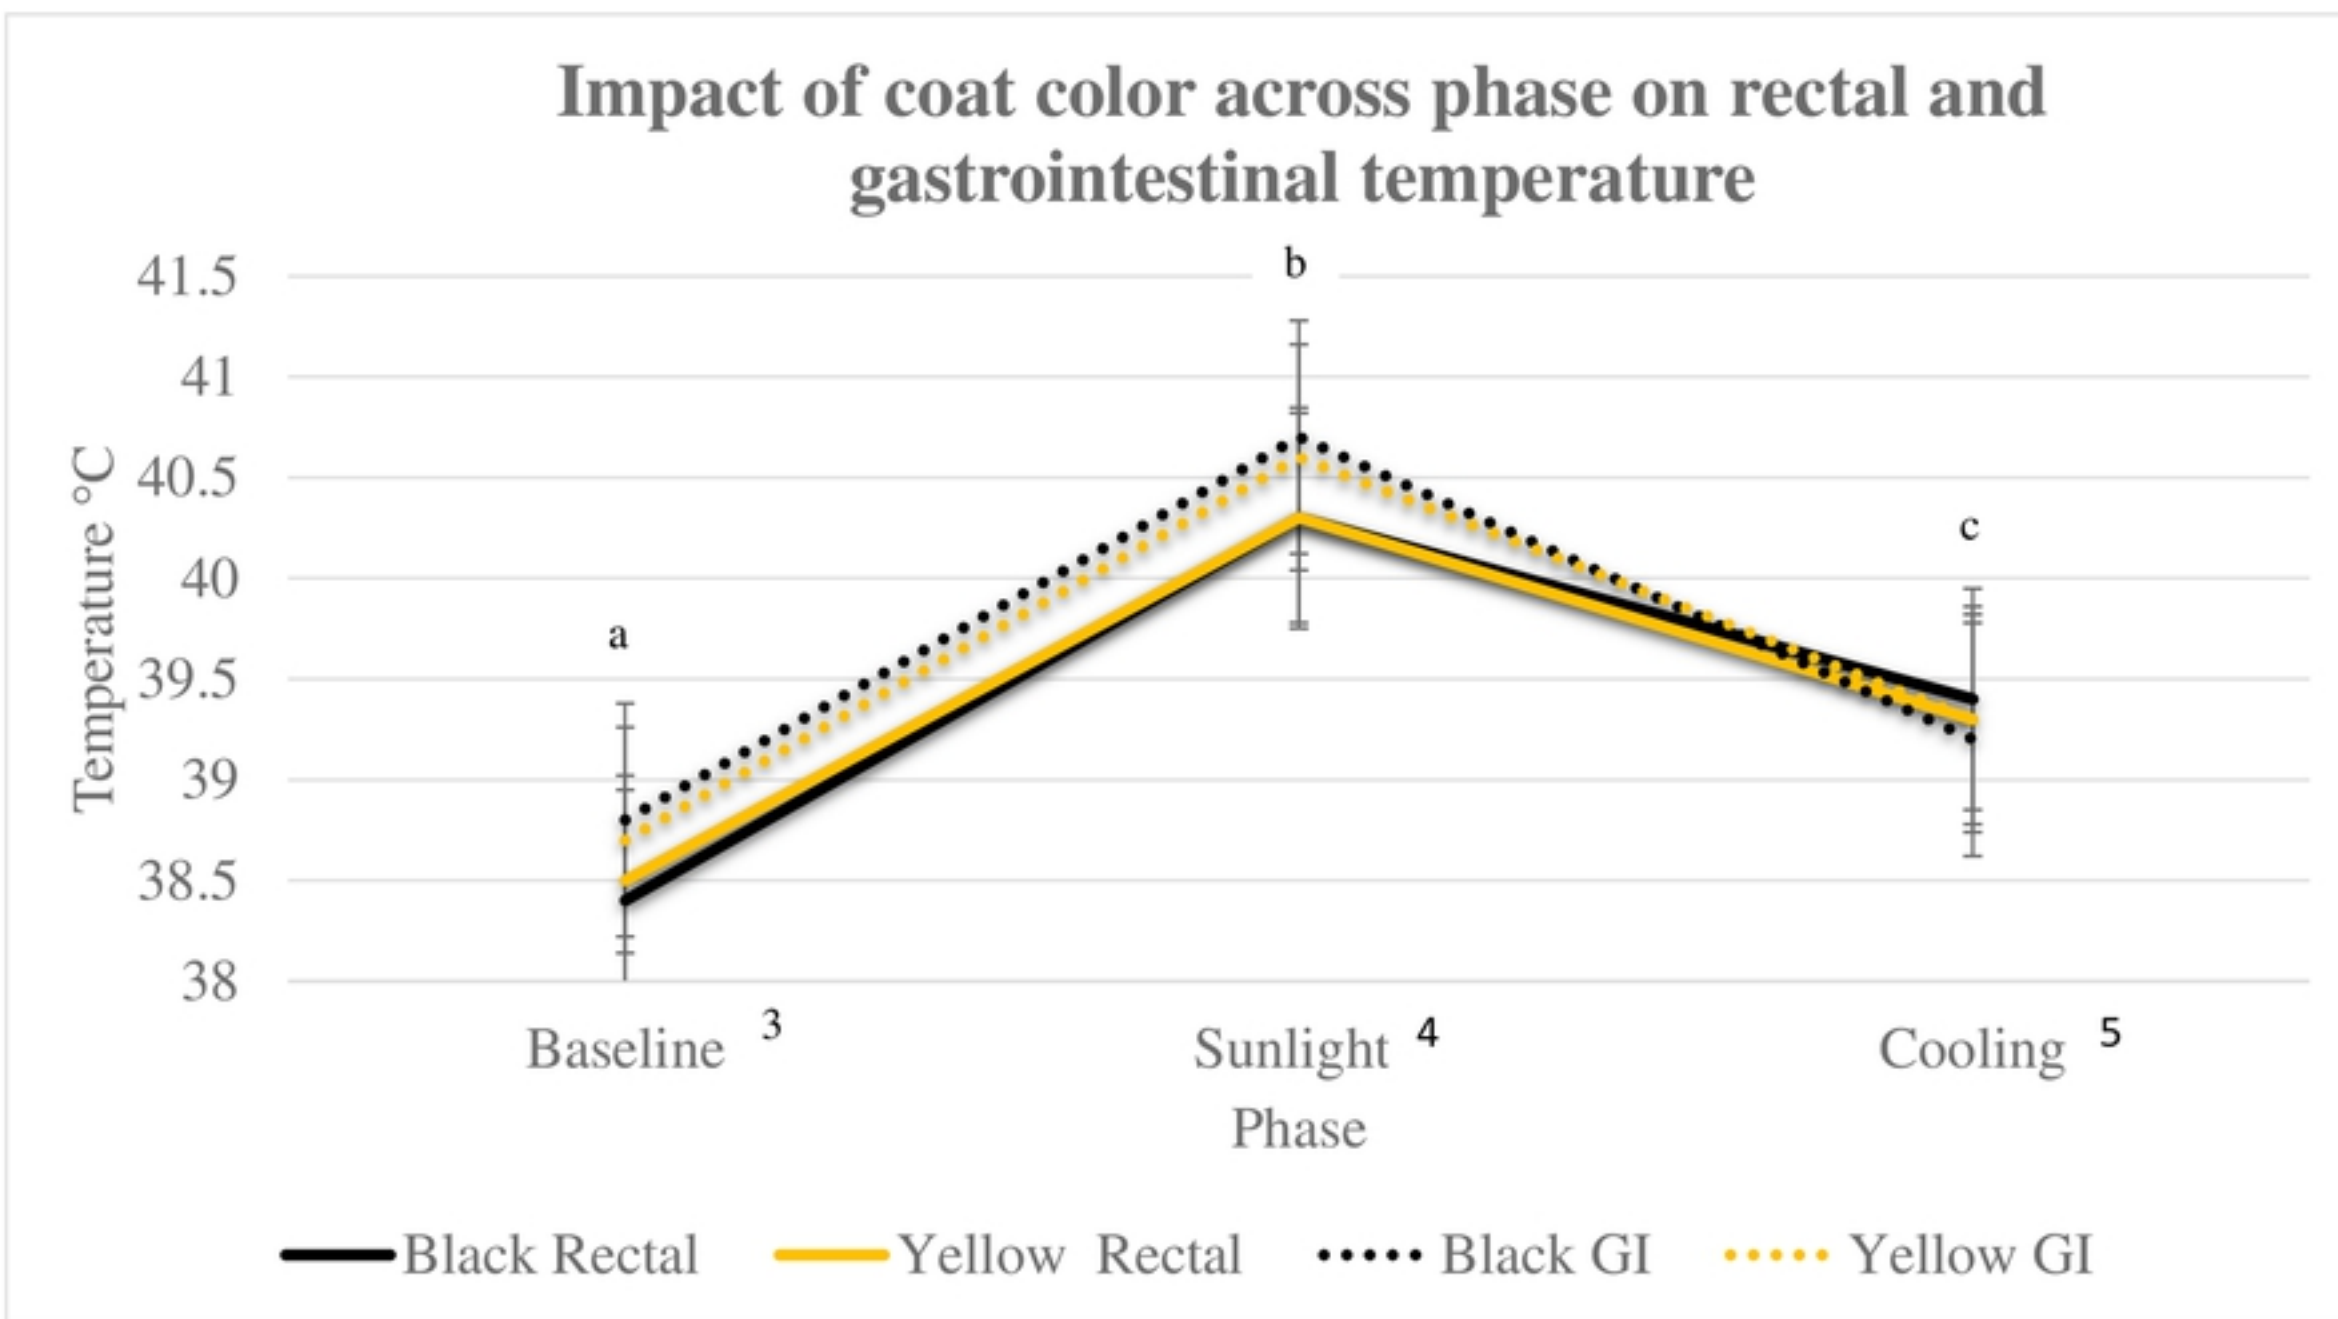

<sup>a,b,c</sup> Notes significant difference by phase

\* Notes significant difference by color

<sup>1</sup> Rectal temperature was recorded by inserting thermometer to a depth of approximately 2 cm with petroleum jelly

<sup>2</sup> GI (gastrointestinal) temperature was recorded with an ingestible thermistor CorTemp 30 minutes prior to baseline

<sup>3</sup> Baseline occurred 30 minutes prior to sunlight exposure (sunlight) and recorded initial measurements

<sup>4</sup> Sunlight phase consisted of 30 minutes of active walking in a sunny outdoor area on a leash

<sup>5</sup> Cooling phase occurred 15 minutes after walking in a climate-controlled room with water

**Figure 3**

**Fig 4.** Mean change in body surface temperature measured by thermography<sup>1</sup> at the eye<sup>2</sup> and abdomen<sup>3</sup> in non-conditioned Labradors

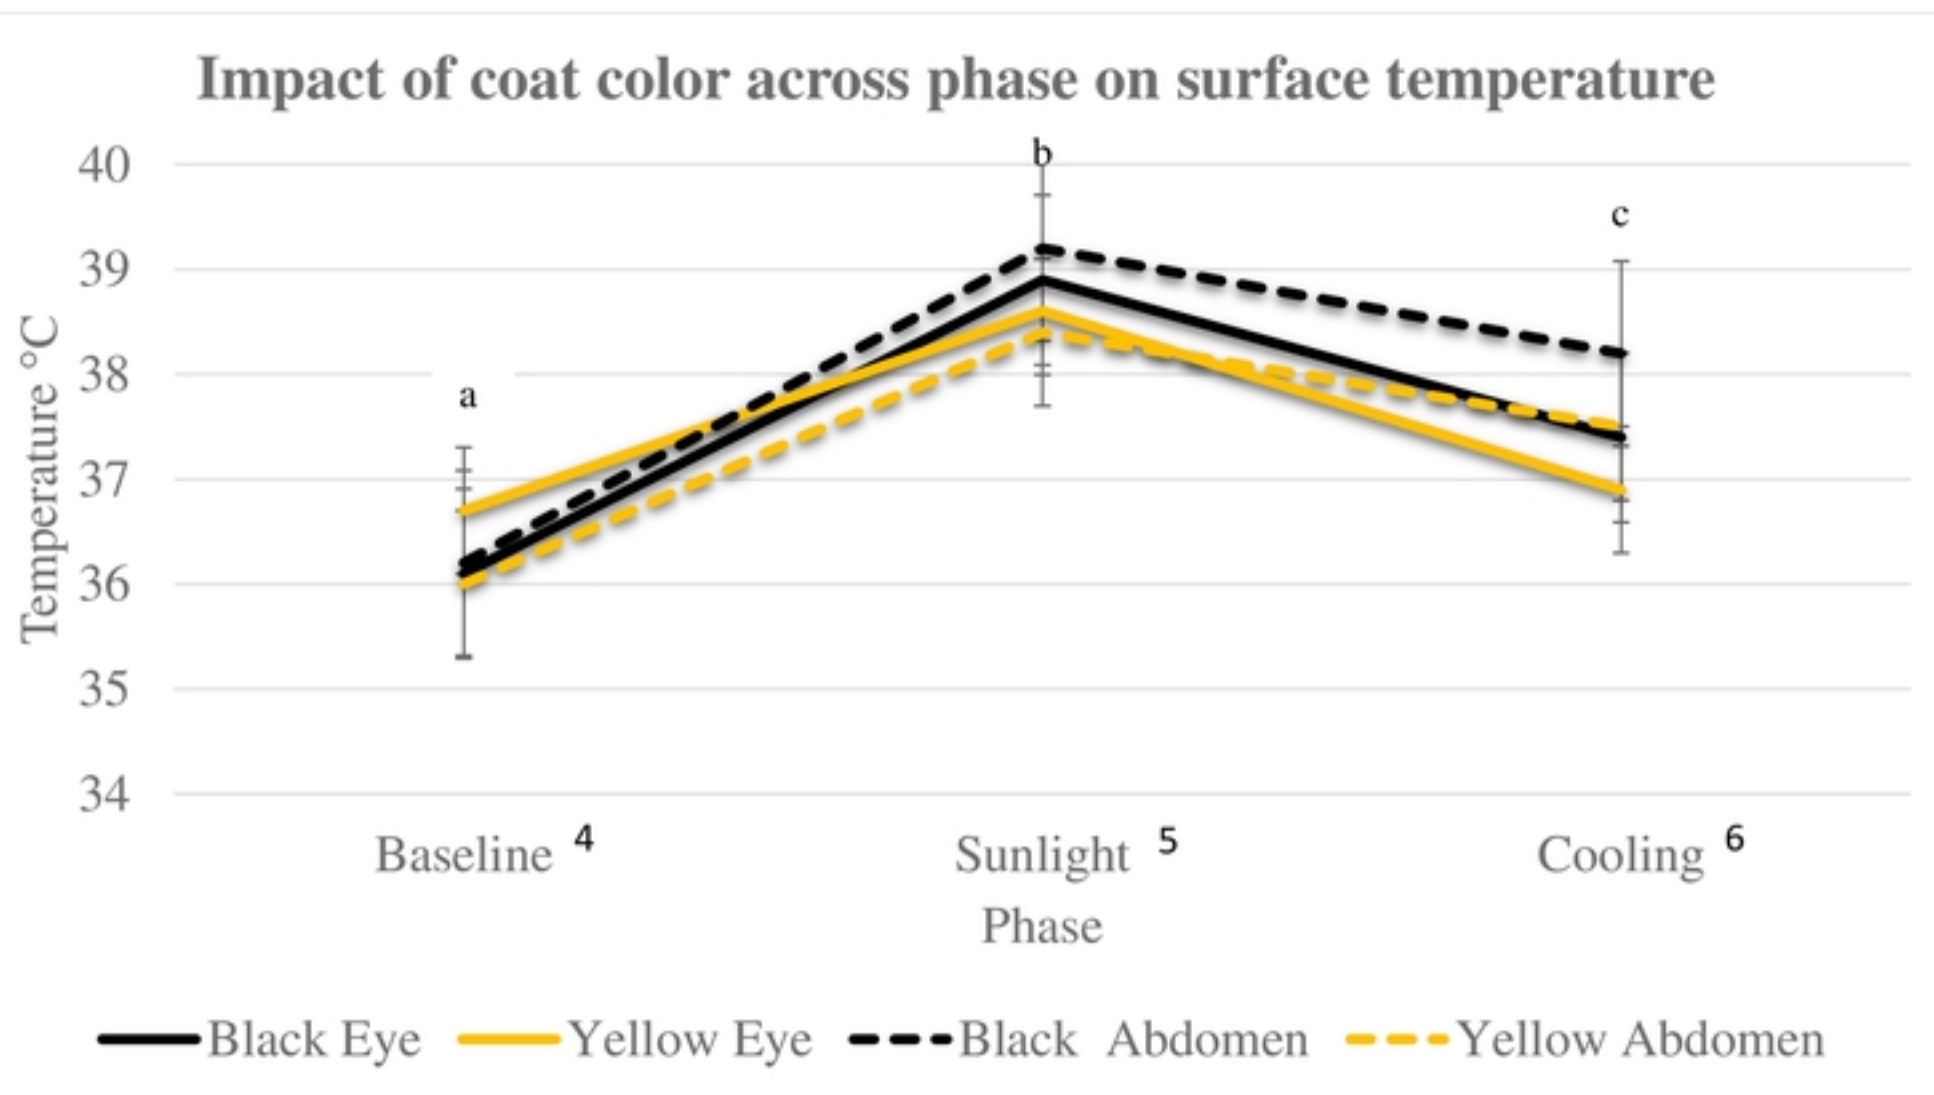

<sup>a,b,c</sup> Notes significant difference by phase

\* Notes significant difference by coat color

<sup>1</sup>Thermography captured using FLIR T400

<sup>2</sup>Eye temperature was captured using thermography focusing on left eye

<sup>3</sup>Abdomen (Ab) temperature was captured using thermography focusing on left caudal abdomen

<sup>4</sup>Baseline occurred 30 minutes prior to sunlight exposure (sunlight) and recorded initial measurements

<sup>5</sup>Sunlight phase consisted of 30 minutes of active walking in a sunny outdoor area on a leash

<sup>6</sup>Cooling phase occurred 15 minutes after walking in a climate-controlled room with water

**Figure 4**

**Fig 5.** Mean change in respiration rates<sup>1</sup> across three phases in non-conditioned Labradors.

### Impact of coat color across phase on respiration rate

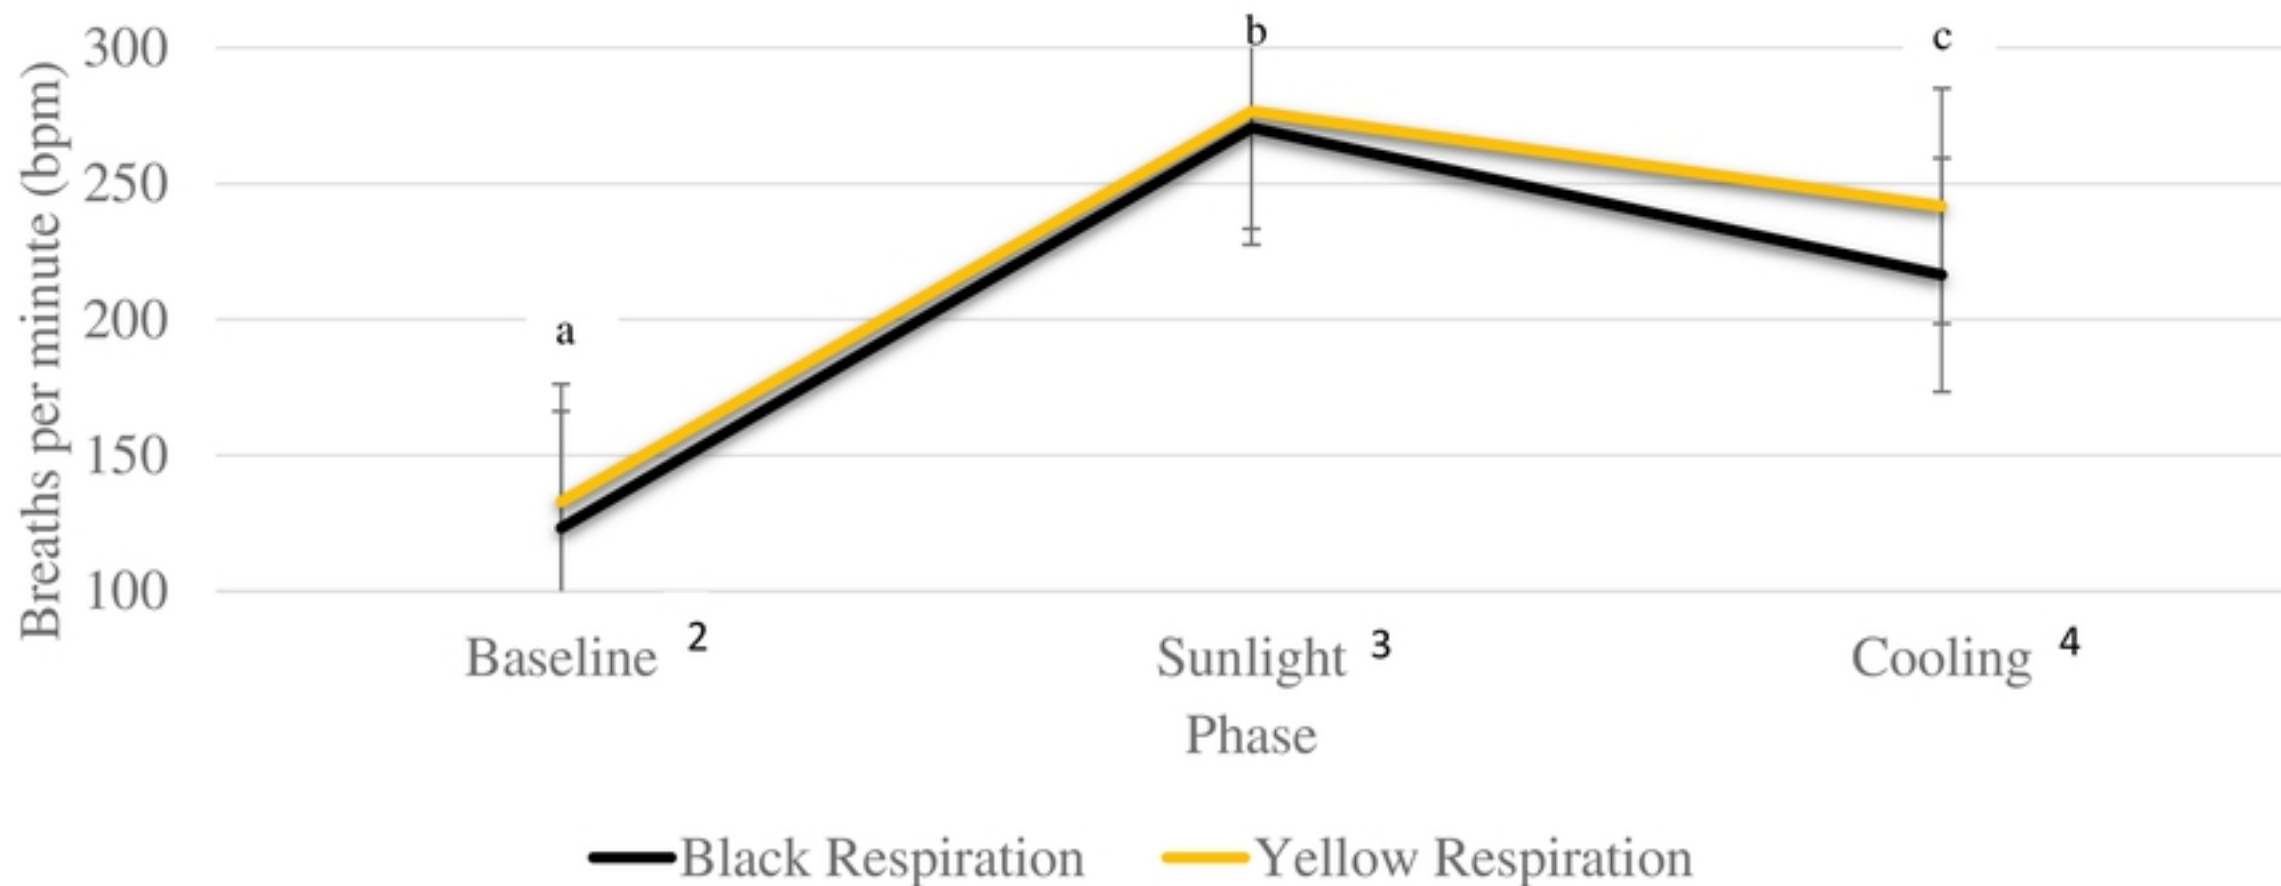

<sup>a,b,c</sup> Notes significant difference by phase

<sup>\*</sup> Notes significant difference by coat color

<sup>1</sup> Respiration rate was captured for 30 seconds by a GoPro camera

<sup>2</sup> Baseline occurred 30 minutes prior to sunlight exposure (sunlight) and recorded initial measurements

<sup>3</sup> Sunlight phase consisted of 30 minutes of active walking in a sunny outdoor area on a leash

<sup>4</sup> Cooling phase occurred 15 minutes after walking in a climate-controlled room with water

**Figure 5**

**Fig 6.** Mean change in rectal<sup>1</sup> and gastrointestinal temperature (GI)<sup>2</sup> across three phases in non-conditioned Labradors.

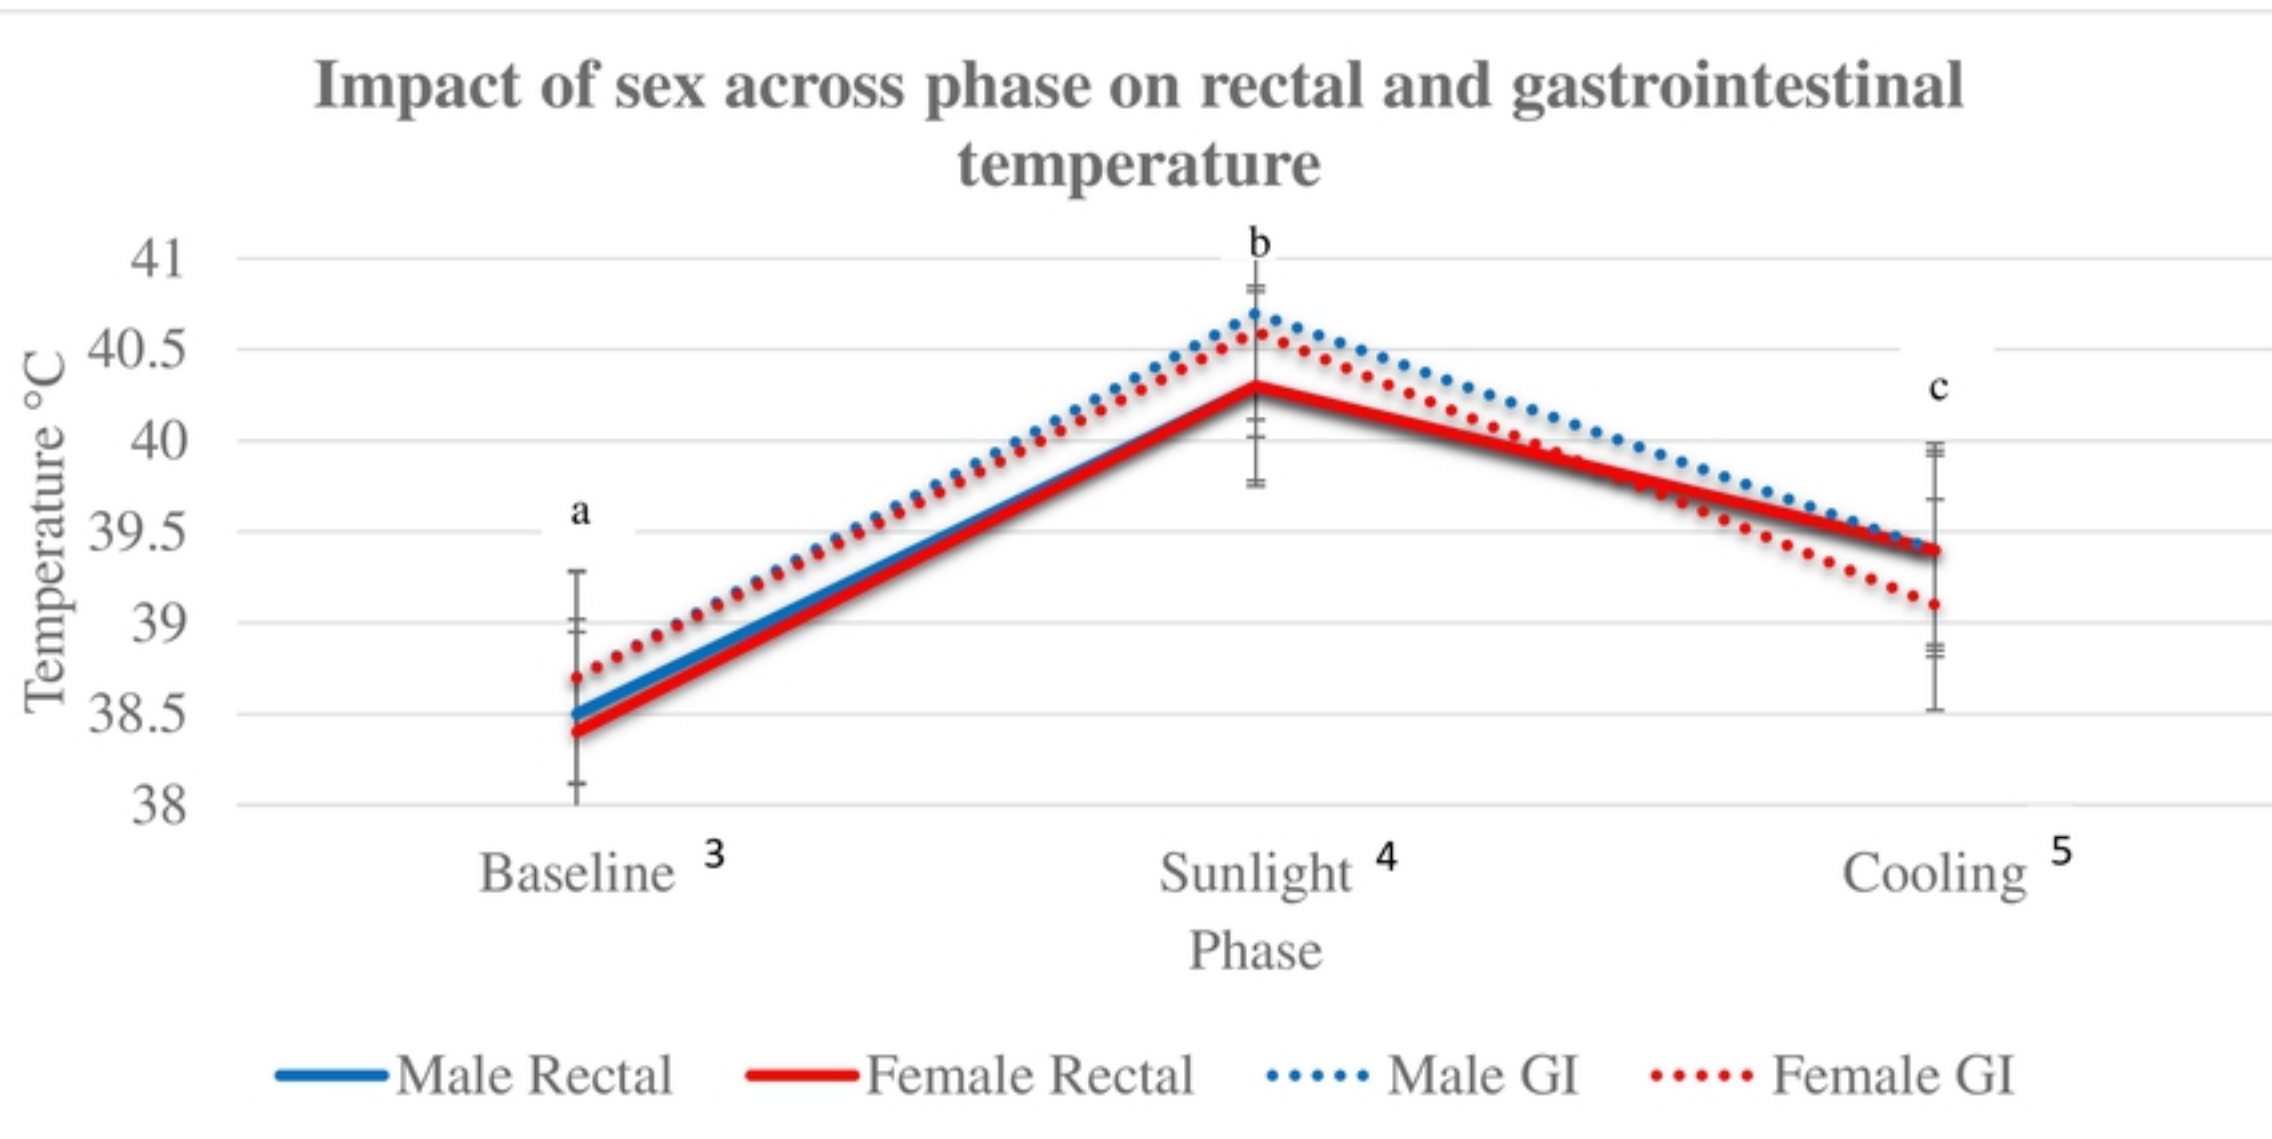

<sup>a,b,c</sup> Notes significant difference observed by phase

\* Notes significant difference observed by sex

<sup>1</sup> Rectal temperature was recorded by inserting thermometer to a depth of approximately 2 cm with petroleum jelly

<sup>2</sup> GI (gastrointestinal) temperature was recorded with an ingestible thermistor CorTemp administered 30 minutes prior to baseline

<sup>3</sup> Baseline occurred 30 minutes prior to sunlight exposure and recorded initial measurements

<sup>4</sup> Sunlight phase consisted of 30 minutes of active walking in a sunny outdoor area on a leash

<sup>5</sup> Cooling phase occurred 15 minutes after walking in a climate-controlled room with water

**Figure 6**



**Fig 7.** Mean change in surface temperature measured by thermography<sup>1</sup> at the eye<sup>2</sup> and abdomen<sup>3</sup> in non-conditioned Labradors across three phases.

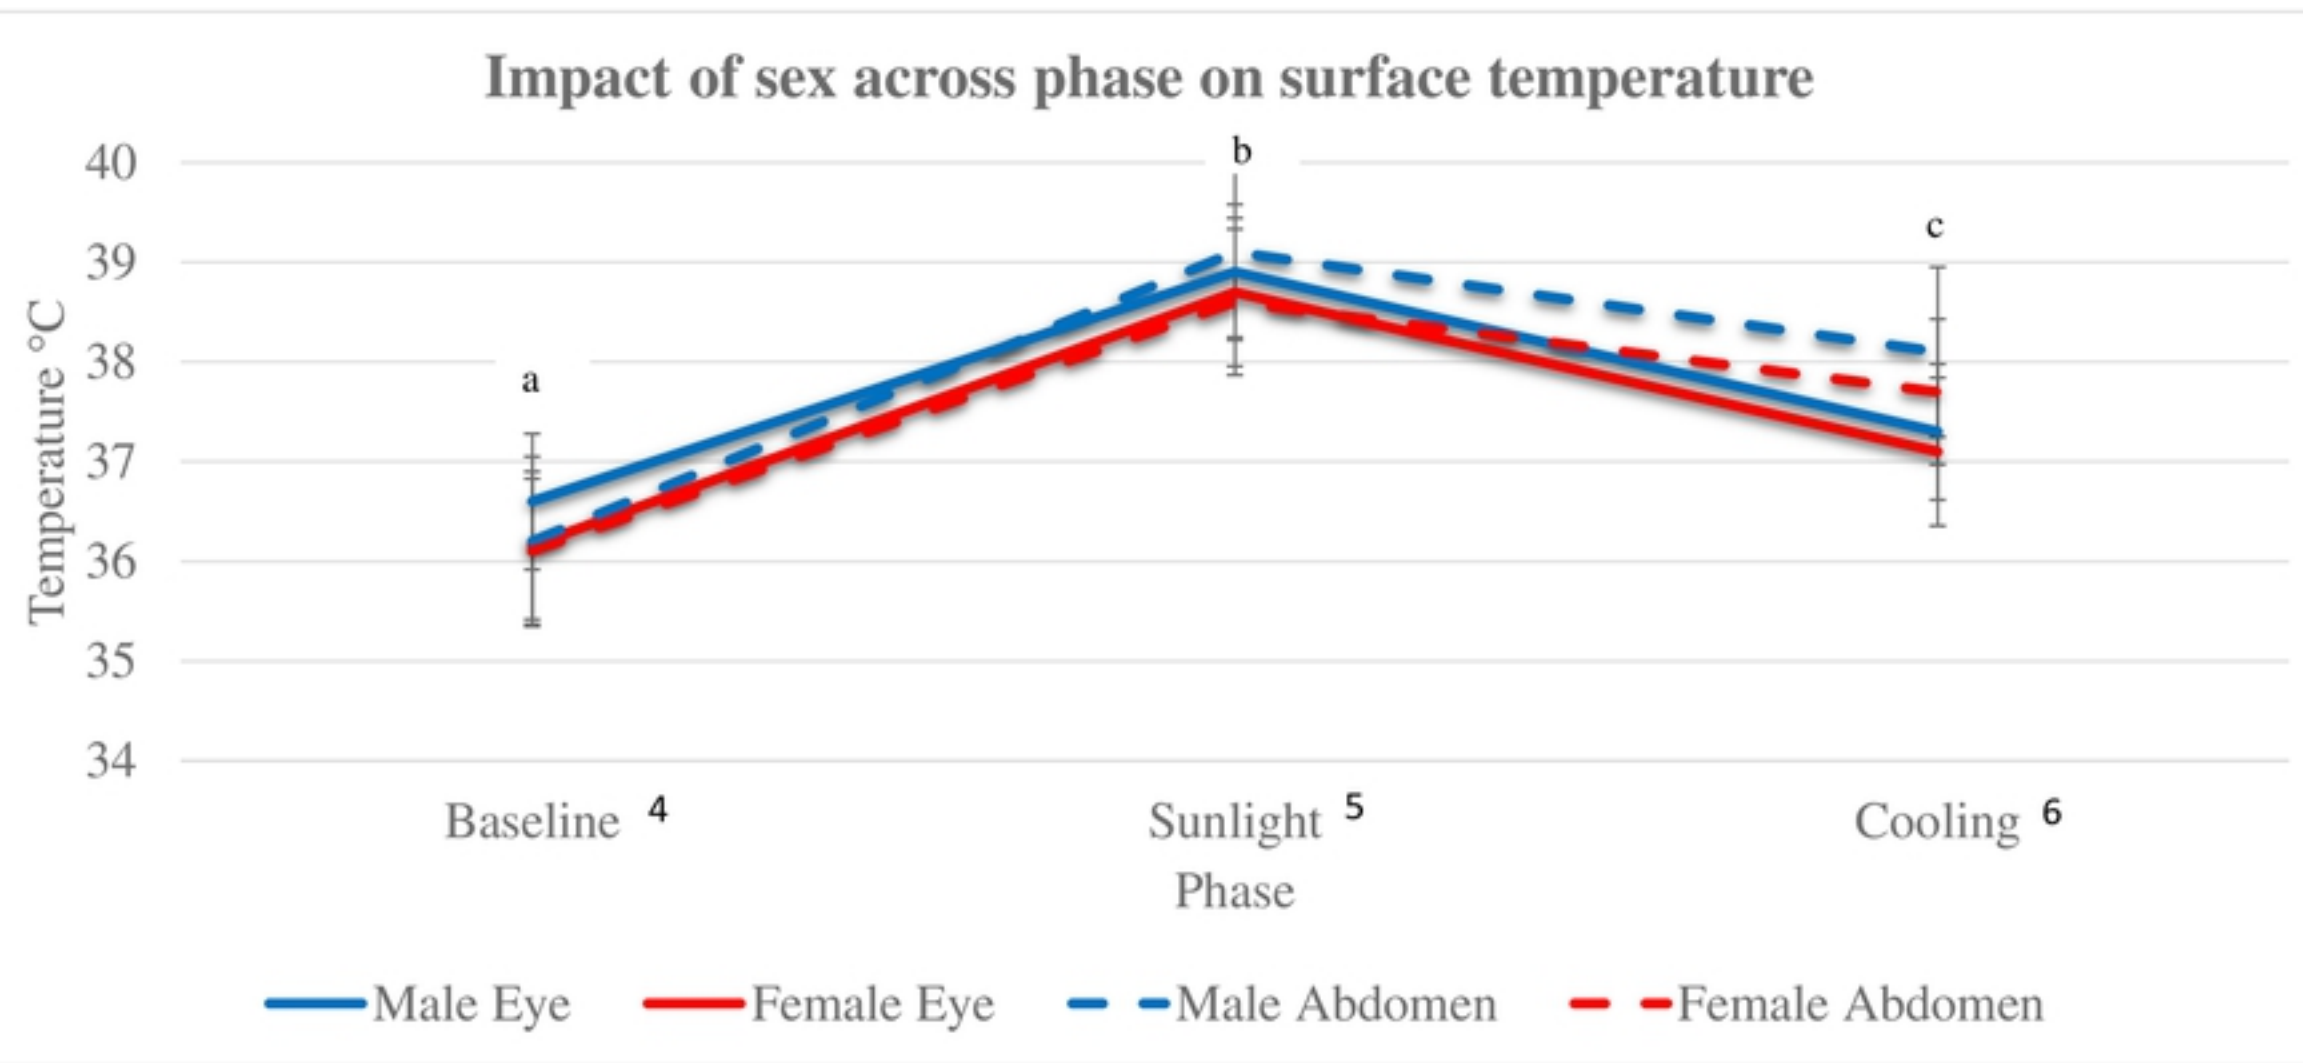

<sup>a,b,c</sup> Notes significant difference observed by phase

<sup>\*</sup> Notes significant difference observed by sex

<sup>1</sup>Thermography captured using FLIR T400

<sup>2</sup>Eye temperature was captured using thermography focusing on left eye

<sup>3</sup>Abdomen (Ab) temperature was captured using thermography focusing on left caudal abdomen

<sup>4</sup>Baseline occurred 30 minutes prior to sunlight exposure and recorded initial measurements

<sup>5</sup>Sunlight phase consisted of 30 minutes of active walking in a sunny outdoor area on a leash

<sup>6</sup>Cooling phase occurred 15 minutes after walking in a climate-controlled room with water

**Figure 7**

**Fig 8.** Mean change in respiration rates<sup>1</sup> across three phases in non-conditioned Labradors.

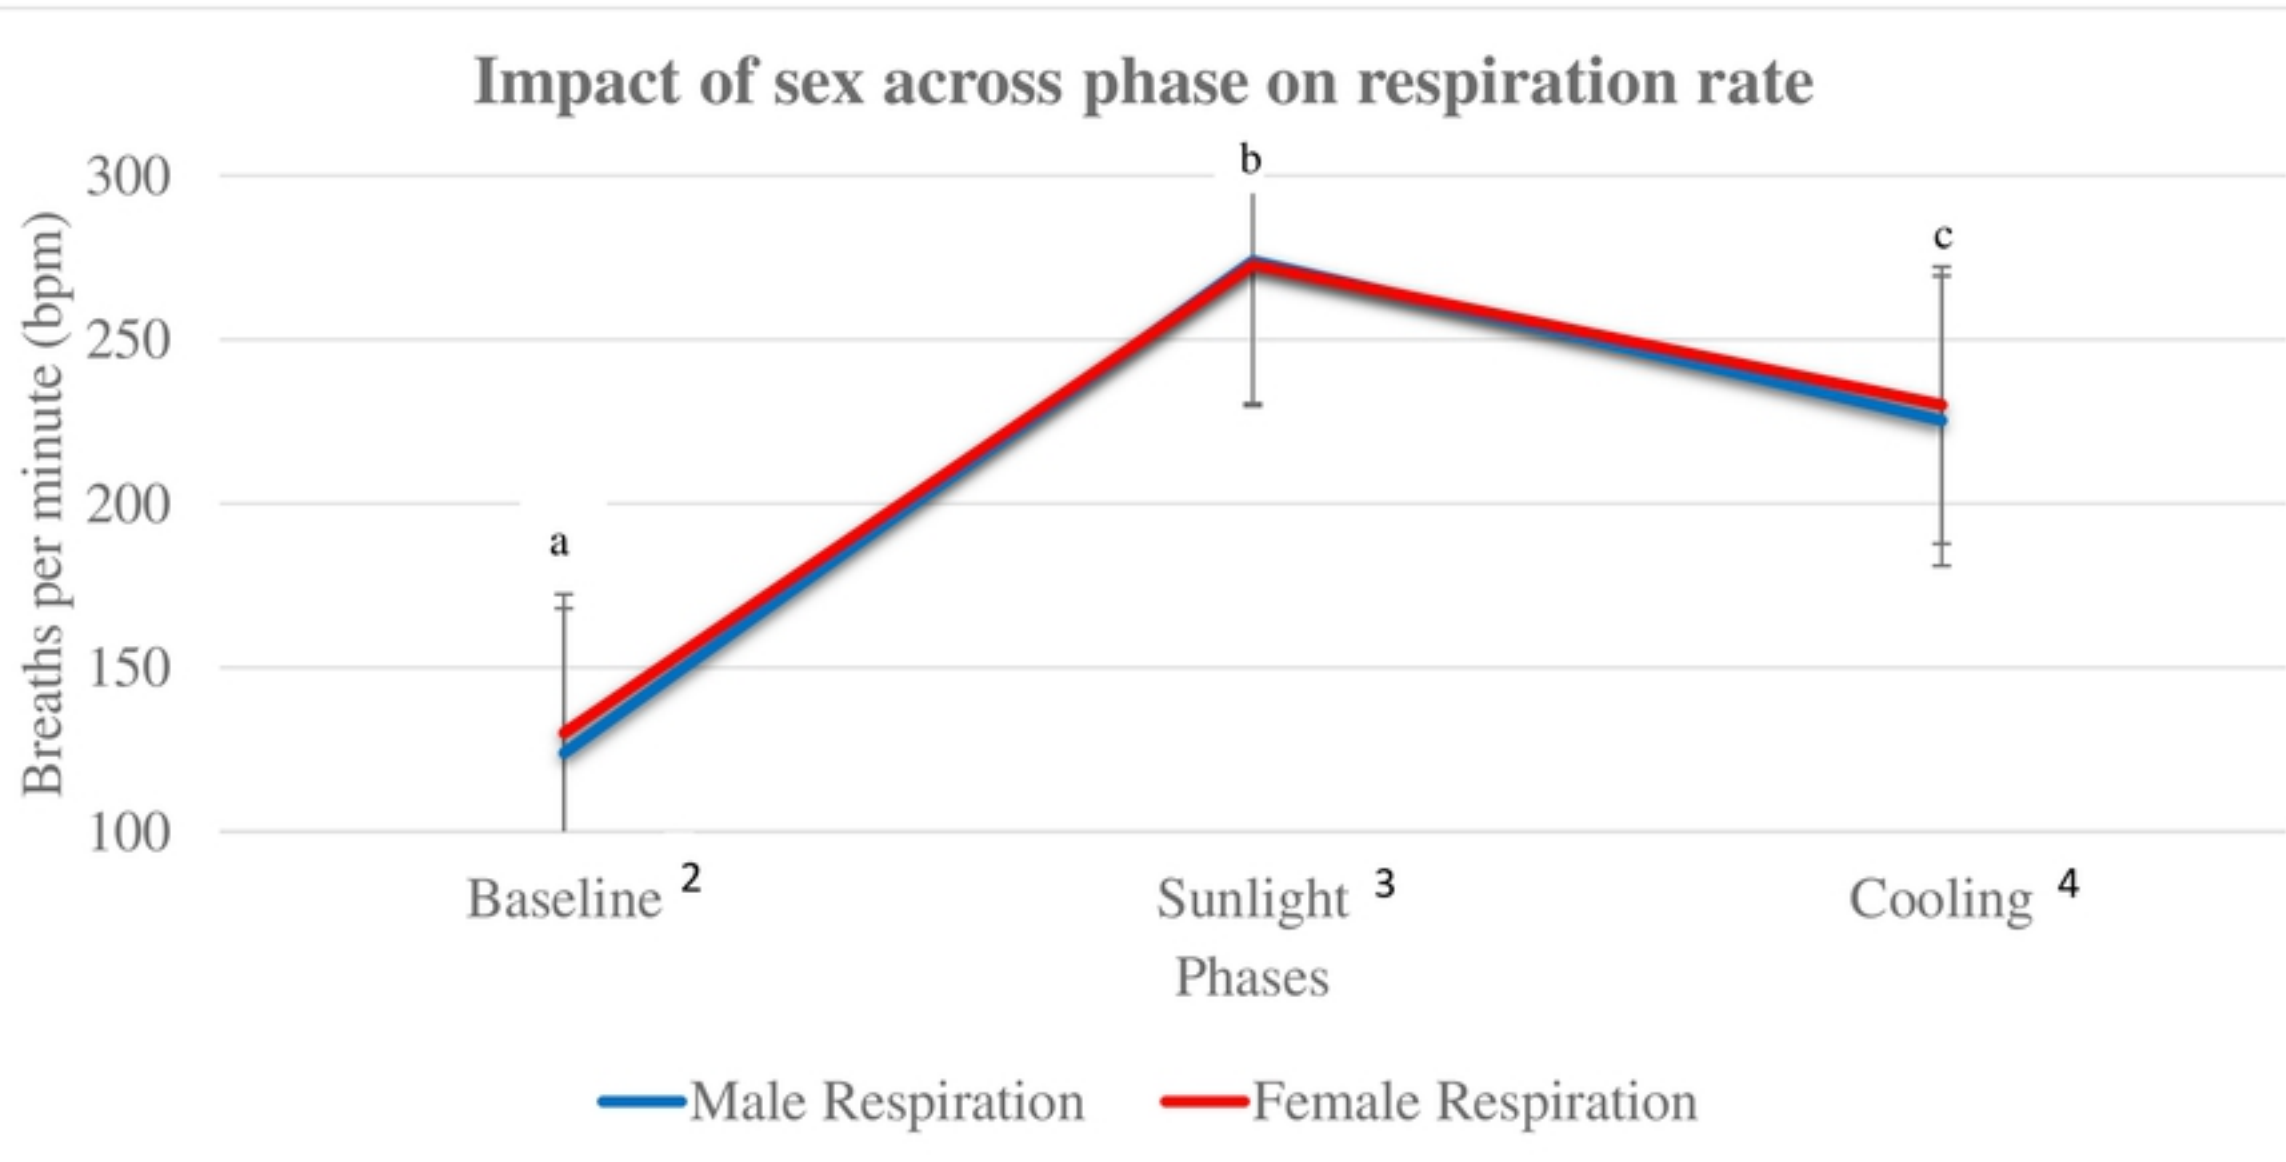

<sup>a,b,c</sup> Notes significant difference observed by phase

\* Notes significant difference observed by sex

<sup>1</sup> Respiration rate was captured for 30 seconds by a GoPro camera

<sup>2</sup> Baseline occurred 30 minutes prior to sunlight exposure and recorded initial measurements

<sup>3</sup> Sunlight phase consisted of 30 minutes of controlled pace walking in a sunny outdoor area on a leash

<sup>4</sup> Cooling phase occurred 15 minutes after walking in a climate-controlled room with water

**Figure 8**
